# Supplementary material
Source: MDPI journal article supplement (https://www.mdpi.com/2073-4433/12/11/1416)
Supplement: s1 [file s1]

# Supplementary Materials: Mixed Temperature-Moisture Signal in $\delta^{18}\text{O}$ Records of Boreal Conifers from the Permafrost Zone

Mikhail S. Zharkov <sup>1</sup>, Marina V. Fonti <sup>1</sup>, Tatyana V. Trushkina <sup>2</sup>, Valentin V. Barinov <sup>1</sup>, Anna V. Taynik <sup>1</sup>, Trevor Porter <sup>3</sup>, Matthias Saurer <sup>4</sup> and Olga V. Churakova (Sidorova) <sup>1,4,\*</sup>

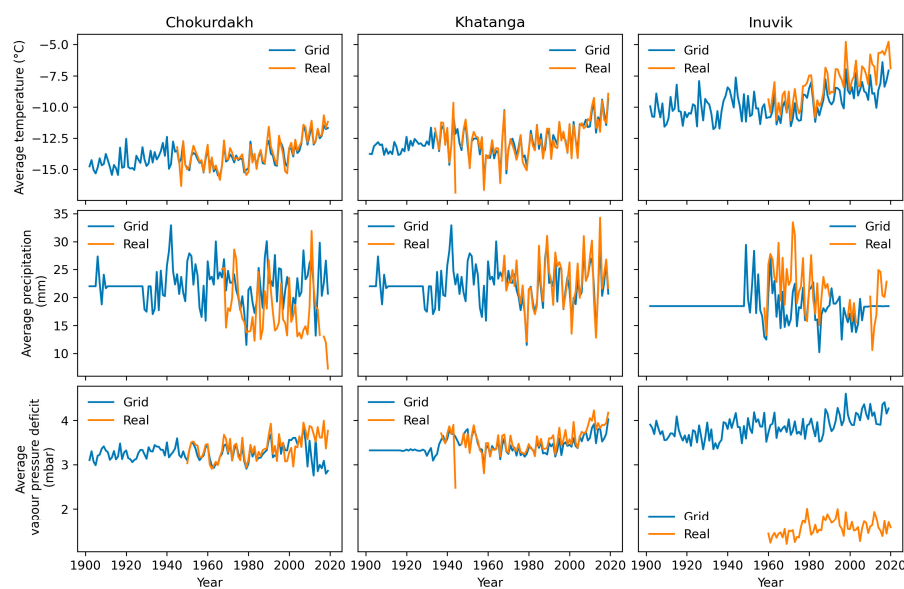

**Figure S1.** Annual air temperature (upper pannel), precipitation (middle pannel) and vapor pressure deficit (low pannel) data obtained from the gridded *climexp* vs. local *meteo.ru* data for Chokurdakh (left panel), Khatanga (middle panel) and Inuvik *climate.weather.gc.ca*, and <https://climexp.knmi.nl/selectstation.cgi?id=someone@somewhere> (right panel), respectively.

**Table S1.** Correlation coefficients ( $r$ ) between annual climate data obtained from the local weather stations for different time periods and climate explore gridded data (1901–2020).

| Weather station         | Coordinates<br>Local station | Coordinates KNMI Grid-data | Air temperature |               | Precipitation |               | Vapor pressure deficit |               |
|-------------------------|------------------------------|----------------------------|-----------------|---------------|---------------|---------------|------------------------|---------------|
|                         |                              |                            | $r$             | Period        | $r$           | Period        | $r$                    | Period        |
| Chokurdakh<br>(IND, RU) | 70°37' N, 147°53' E          | 70°–71° N, 147°–148° E     | <b>0.90</b>     | 1939–<br>2019 | 0.22          | 1966–<br>2019 | <b>0.34</b>            | 1940–<br>2019 |
| Khatanga<br>(TAY, RU)   | 71°59' N, 102°28' E          | 71°–72° N, 102°–103° E     | <b>0.90</b>     | 1906–<br>2019 | <b>0.91</b>   | 1966–<br>2019 | <b>0.75</b>            | 1936–<br>2019 |
| Inuvik<br>(CAN)         | 68°30' N, 133°48' W          | 68°–69° N, 133°–134° W     | <b>0.93</b>     | 1959–<br>2020 | <b>0.65</b>   | 1957–<br>2018 | <b>0.32</b>            | 1959–<br>2020 |

Note, \*Significant  $P$ -Value at the level  $<0.01$  are marked in bold.

**Table S2.** Trend analysis ( $r$ ) and ( $p$ -values) calculated based on the local weather station observations for the periods 1901–1979, 1980–2020 and 1901–2020 for annual (January–December, J-D), winter (December, January, February, DJF), spring (March, April, May, MAM), summer (June, July, August, JJA), autumn (September, October, November, SON) air temperature, precipitation and vapor pressure deficit (VPD).

| Weather station | Local station, coordinates | Season     | Temperature          |                             |                             | Precipitation               |                             |                             | Vapor pressure deficit      |                             |                             |
|-----------------|----------------------------|------------|----------------------|-----------------------------|-----------------------------|-----------------------------|-----------------------------|-----------------------------|-----------------------------|-----------------------------|-----------------------------|
|                 |                            |            | 1901–1979            | 1980–2020                   | 1901–2020                   | 1901–1979                   | 1980–2020                   | 1901–2020                   | 1901–1979                   | 1980–2020                   | 1901–2020                   |
| Chokurdakh (RU) | 70° 37' N, 147° 53' E      | Annual J-D | 0.03<br>( $p=0.88$ ) | <b>0.69</b><br>( $p=0.00$ ) | <b>0.63</b><br>( $p=0.00$ ) | 0.42<br>( $p=0.15$ )        | 0.14<br>( $p=0.41$ )        | <b>0.32</b><br>( $p=0.02$ ) | 0.09<br>( $p=0.64$ )        | <b>0.54</b><br>( $p=0.00$ ) | <b>0.51</b><br>( $p=0.00$ ) |
|                 |                            | Winter DJF | 0.14<br>( $p=0.42$ ) | <b>0.49</b><br>( $p=0.00$ ) | <b>0.31</b><br>( $p=0.01$ ) | <b>0.6</b><br>( $p=0.03$ )  | 0.26<br>( $p=0.10$ )        | 0.07<br>( $p=0.63$ )        | 0.05<br>( $p=0.80$ )        | <b>0.44</b><br>( $p=0.01$ ) | <b>0.34</b><br>( $p=0.00$ ) |
|                 |                            | Spring MAM | 0.09<br>( $p=0.60$ ) | <b>0.36</b><br>( $p=0.02$ ) | <b>0.27</b><br>( $p=0.02$ ) | 0.07<br>( $p=0.83$ )        | <b>0.49</b><br>( $p=0.00$ ) | <b>0.46</b><br>( $p=0.00$ ) | 0.03<br>( $p=0.87$ )        | 0.29<br>( $p=0.07$ )        | <b>0.25</b><br>( $p=0.04$ ) |
|                 |                            | Summer JJA | 0.02<br>( $p=0.89$ ) | <b>0.69</b><br>( $p=0.00$ ) | <b>0.56</b><br>( $p=0.00$ ) | 0.38<br>( $p=0.20$ )        | <b>0.4</b><br>( $p=0.01$ )  | 0.12<br>( $p=0.41$ )        | 0.0<br>( $p=1.00$ )         | <b>0.61</b><br>( $p=0.00$ ) | <b>0.58</b><br>( $p=0.00$ ) |
|                 |                            | Autumn SON | 0.19<br>( $p=0.25$ ) | 0.22<br>( $p=0.16$ )        | <b>0.33</b><br>( $p=0.00$ ) | 0.35<br>( $p=0.24$ )        | 0.12<br>( $p=0.46$ )        | 0.17<br>( $p=0.22$ )        | 0.24<br>( $p=0.19$ )        | 0.09<br>( $p=0.57$ )        | 0.15<br>( $p=0.20$ )        |
| Khatanga (RU)   | 71°59' N, 102°28' E        | Annual J-D | 0.2<br>( $p=0.17$ )  | <b>0.64</b><br>( $p=0.00$ ) | <b>0.38</b><br>( $p=0.00$ ) | <b>0.67</b><br>( $p=0.01$ ) | 0.13<br>( $p=0.41$ )        | 0.14<br>( $p=0.31$ )        | 0.29<br>( $p=0.06$ )        | <b>0.77</b><br>( $p=0.00$ ) | <b>0.4</b><br>( $p=0.00$ )  |
|                 |                            | Winter DJF | 0.03<br>( $p=0.83$ ) | <b>0.58</b><br>( $p=0.00$ ) | <b>0.44</b><br>( $p=0.00$ ) | 0.41<br>( $p=0.17$ )        | 0.29<br>( $p=0.07$ )        | 0.05<br>( $p=0.71$ )        | <b>0.33</b><br>( $p=0.04$ ) | <b>0.6</b><br>( $p=0.00$ )  | <b>0.36</b><br>( $p=0.00$ ) |
|                 |                            | Spring MAM | 0.01<br>( $p=0.94$ ) | <b>0.53</b><br>( $p=0.00$ ) | <b>0.28</b><br>( $p=0.01$ ) | <b>0.59</b><br>( $p=0.03$ ) | 0.09<br>( $p=0.59$ )        | 0.15<br>( $p=0.27$ )        | 0.06<br>( $p=0.71$ )        | <b>0.63</b><br>( $p=0.00$ ) | <b>0.35</b><br>( $p=0.00$ ) |
|                 |                            | Summer JJA | 0.27<br>( $p=0.07$ ) | <b>0.41</b><br>( $p=0.01$ ) | 0.15<br>( $p=0.18$ )        | 0.23<br>( $p=0.45$ )        | 0.19<br>( $p=0.23$ )        | 0.05<br>( $p=0.74$ )        | <b>0.33</b><br>( $p=0.03$ ) | <b>0.38</b><br>( $p=0.02$ ) | 0.09<br>( $p=0.42$ )        |
|                 |                            | Autumn SON | 0.34<br>( $p=0.02$ ) | 0.12<br>( $p=0.47$ )        | 0.03<br>( $p=0.78$ )        | 0.39<br>( $p=0.19$ )        | 0.23<br>( $p=0.15$ )        | 0.09<br>( $p=0.50$ )        | <b>0.44</b><br>( $p=0.00$ ) | 0.13<br>( $p=0.42$ )        | 0.03<br>( $p=0.78$ )        |
| Inuvik (CAN)    | 68°30' N, 133°48' W        | Annual J-D | 0.26<br>( $p=0.27$ ) | <b>0.67</b><br>( $p=0.00$ ) | <b>0.77</b><br>( $p=0.00$ ) | 0.04<br>( $p=0.85$ )        | 0.17<br>( $p=0.41$ )        | <b>0.36</b><br>( $p=0.01$ ) | <b>0.58</b><br>( $p=0.01$ ) | 0.08<br>( $p=0.61$ )        | <b>0.35</b><br>( $p=0.01$ ) |
|                 |                            | Winter DJF | 0.06<br>( $p=0.82$ ) | <b>0.42</b><br>( $p=0.01$ ) | <b>0.52</b><br>( $p=0.00$ ) | 0.28<br>( $p=0.21$ )        | 0.2<br>( $p=0.33$ )         | 0.24<br>( $p=0.10$ )        | <b>0.52</b><br>( $p=0.02$ ) | <b>0.44</b><br>( $p=0.00$ ) | <b>0.62</b><br>( $p=0.00$ ) |
|                 |                            | Spring MAM | 0.06<br>( $p=0.81$ ) | 0.01<br>( $p=0.97$ )        | 0.23<br>( $p=0.08$ )        | 0.03<br>( $p=0.89$ )        | <b>0.42</b><br>( $p=0.04$ ) | 0.05<br>( $p=0.73$ )        | 0.42<br>( $p=0.07$ )        | <b>0.32</b><br>( $p=0.04$ ) | 0.07<br>( $p=0.62$ )        |
|                 |                            | Summer JJA | 0.24<br>( $p=0.31$ ) | <b>0.53</b><br>( $p=0.00$ ) | <b>0.54</b><br>( $p=0.00$ ) | 0.24<br>( $p=0.28$ )        | 0.32<br>( $p=0.12$ )        | 0.27<br>( $p=0.06$ )        | <b>0.51</b><br>( $p=0.02$ ) | 0.01<br>( $p=0.95$ )        | <b>0.25</b><br>( $p=0.05$ ) |
|                 |                            | Autumn SON | 0.2<br>( $p=0.41$ )  | <b>0.52</b><br>( $p=0.00$ ) | <b>0.65</b><br>( $p=0.00$ ) | 0.24<br>( $p=0.29$ )        | <b>0.64</b><br>( $p=0.00$ ) | <b>0.54</b><br>( $p=0.00$ ) | <b>0.55</b><br>( $p=0.01$ ) | 0.26<br>( $p=0.11$ )        | <b>0.69</b><br>( $p=0.00$ ) |

**Table S3.** Pearson correlation coefficients (*r*) and *p-values* (*p*) calculated between monthly from January until December (1–12) and seasonal (spring 3–5, summer 6–8, autumn 9–11 and winter 12–2) air temperature (Tem.) (a), precipitation (Prec.) (b) and vapor pressure deficit (VPD) (c) versus  $\delta^{18}\text{O}$  in tree-ring cellulose ( $\delta^{18}\text{O}_{\text{cell}}$ ) chronologies obtained from northeastern Yakutia (YAK), eastern Taimyr (TAY) and Mackenzie Delta from Canada (CAN) over the period from 1966–2004.

| (a)                                 |                |             |        |             |             |             |             |              |        |        |         |         |             |             |             |           |             |
|-------------------------------------|----------------|-------------|--------|-------------|-------------|-------------|-------------|--------------|--------|--------|---------|---------|-------------|-------------|-------------|-----------|-------------|
| Parameter                           | Statistics     | Tem. 1      | Tem. 2 | Tem. 3      | Tem. 4      | Tem. 5      | Tem. 6      | Tem. 7       | Tem. 8 | Tem. 9 | Tem. 10 | Tem. 11 | Tem. 12     | Tem. 3-5    | Tem. 6-8    | Tem. 9-11 | Tem. 12-2   |
| $\delta^{18}\text{O}_{\text{cell}}$ | <i>r</i>       | 0.14        | 0.22   | -0.07       | 0.15        | 0.07        | -0.02       | <b>0.49</b>  | 0.18   | 0.06   | 0.21    | 0.16    | -0.03       | 0.06        | <b>0.32</b> | 0.15      | 0.21        |
| YAK                                 | <i>p-value</i> | 0.28        | 0.09   | 0.59        | 0.25        | 0.59        | 0.89        | <b>0.00</b>  | 0.17   | 0.67   | 0.10    | 0.21    | 0.80        | 0.65        | <b>0.01</b> | 0.26      | 0.11        |
| $\delta^{18}\text{O}_{\text{cell}}$ | <i>r</i>       | 0.06        | -0.07  | 0.22        | -0.07       | 0.12        | 0.17        | <b>0.23</b>  | 0.15   | -0.13  | 0.11    | 0.19    | -0.03       | 0.13        | <b>0.27</b> | 0.13      | -0.02       |
| TAY                                 | <i>p-value</i> | 0.61        | 0.56   | 0.06        | 0.58        | 0.31        | 0.15        | <b>0.04</b>  | 0.21   | 0.27   | 0.33    | 0.11    | 0.78        | 0.25        | <b>0.02</b> | 0.25      | 0.86        |
| $\delta^{18}\text{O}_{\text{cell}}$ | <i>r</i>       | 0.19        | 0.09   | 0.26        | <b>0.36</b> | 0.22        | 0.25        | <b>0.32</b>  | 0.05   | 0.25   | 0.10    | 0.05    | 0.26        | <b>0.37</b> | 0.28        | 0.17      | 0.27        |
| CAN                                 | <i>p-value</i> | 0.24        | 0.56   | 0.10        | <b>0.02</b> | 0.16        | 0.11        | <b>0.04</b>  | 0.75   | 0.11   | 0.53    | 0.74    | 0.10        | <b>0.02</b> | 0.07        | 0.28      | 0.08        |
| (b)                                 |                |             |        |             |             |             |             |              |        |        |         |         |             |             |             |           |             |
| Parameter                           | Statistics     | Prec 1      | Prec 2 | Prec 3      | Prec 4      | Prec 5      | Prec 6      | Prec 7       | Prec 8 | Prec 9 | Prec 10 | Prec 11 | Prec 12     | Prec 3-5    | Prec 6-8    | Prec 9-11 | Prec 12-2   |
| $\delta^{18}\text{O}_{\text{cell}}$ | <i>r</i>       | -0.27       | -0.05  | -0.04       | -0.03       | -0.07       | 0.27        | <b>-0.37</b> | -0.06  | -0.03  | 0.04    | -0.02   | -0.16       | -0.08       | -0.12       | -0.03     | -0.24       |
| YAK                                 | <i>p-value</i> | 0.10        | 0.77   | 0.81        | 0.84        | 0.69        | 0.11        | <b>0.02</b>  | 0.71   | 0.85   | 0.83    | 0.89    | 0.34        | 0.64        | 0.46        | 0.88      | 0.15        |
| $\delta^{18}\text{O}_{\text{cell}}$ | <i>r</i>       | 0.05        | -0.10  | 0.14        | -0.16       | -0.11       | 0.00        | 0.07         | -0.11  | 0.05   | -0.12   | 0.17    | 0.04        | -0.06       | -0.03       | 0.01      | 0.02        |
| TAY                                 | <i>p-value</i> | 0.76        | 0.53   | 0.39        | 0.32        | 0.49        | 0.99        | 0.66         | 0.50   | 0.77   | 0.43    | 0.30    | 0.81        | 0.70        | 0.85        | 0.97      | 0.90        |
| $\delta^{18}\text{O}_{\text{cell}}$ | <i>r</i>       | -0.13       | 0.15   | -0.03       | -0.24       | -0.02       | -0.28       | -0.29        | 0.03   | -0.01  | -0.13   | -0.06   | -0.05       | -0.12       | -0.27       | -0.05     | -0.07       |
| CAN                                 | <i>p-value</i> | 0.44        | 0.38   | 0.85        | 0.17        | 0.93        | 0.11        | 0.09         | 0.85   | 0.97   | 0.46    | 0.71    | 0.78        | 0.48        | 0.11        | 0.77      | 0.70        |
| (c)                                 |                |             |        |             |             |             |             |              |        |        |         |         |             |             |             |           |             |
| Parameter                           | Statistics     | VPD 1       | VPD 2  | VPD 3       | VPD 4       | VPD 5       | VPD 6       | VPD 7        | VPD 8  | VPD 9  | VPD 10  | VPD 11  | VPD 12      | VPD 3-5     | VPD 6-8     | VPD 9-11  | VPD 12-2    |
| $\delta^{18}\text{O}_{\text{cell}}$ | <i>r</i>       | 0.08        | 0.16   | -0.04       | -0.03       | -0.03       | 0.01        | <b>0.31</b>  | 0.17   | -0.02  | 0.06    | 0.13    | -0.12       | -0.03       | 0.24        | 0.04      | 0.08        |
| YAK                                 | <i>p-value</i> | 0.57        | 0.23   | 0.76        | 0.85        | 0.81        | 0.95        | <b>0.02</b>  | 0.22   | 0.88   | 0.64    | 0.34    | 0.39        | 0.85        | 0.08        | 0.78      | 0.56        |
| $\delta^{18}\text{O}_{\text{cell}}$ | <i>r</i>       | 0.01        | -0.14  | <b>0.26</b> | -0.08       | 0.11        | 0.13        | 0.16         | 0.05   | -0.20  | 0.10    | 0.15    | -0.09       | 0.10        | 0.19        | -0.02     | -0.11       |
| TAY                                 | <i>p-value</i> | 0.95        | 0.25   | <b>0.03</b> | 0.49        | 0.37        | 0.28        | 0.18         | 0.71   | 0.09   | 0.40    | 0.20    | 0.46        | 0.43        | 0.10        | 0.85      | 0.38        |
| $\delta^{18}\text{O}_{\text{cell}}$ | <i>r</i>       | <b>0.37</b> | 0.24   | <b>0.36</b> | <b>0.50</b> | <b>0.45</b> | <b>0.36</b> | <b>0.41</b>  | 0.07   | 0.17   | -0.07   | 0.05    | <b>0.32</b> | <b>0.54</b> | <b>0.44</b> | 0.11      | <b>0.37</b> |
| CAN                                 | <i>p-value</i> | <b>0.01</b> | 0.12   | <b>0.02</b> | <b>0.00</b> | <b>0.00</b> | <b>0.02</b> | <b>0.01</b>  | 0.65   | 0.29   | 0.66    | 0.76    | <b>0.04</b> | <b>0.00</b> | <b>0.00</b> | 0.49      | <b>0.02</b> |

Note: Significant correlation coefficients are selected in bold.
